# Supplementary material
Source: PubMed Central journal article supplement (PMC5653737)
Supplement: mol-23-17_013_Liu_Suppl.pdf [file mol-23-17_013_Liu_Suppl.pdf]

Supplemental Data

miR-210 Protects Renal Cell Against Hypoxia-induced Apoptosis by Targeting HIF-1 Alpha

Li-Li Liu,<sup>1,2</sup> Dahu Li,<sup>1</sup> Yun-Ling He,<sup>1</sup> Yan-Zhao Zhou,<sup>1</sup> Sheng-Hui Gong,<sup>1</sup> Li-Ying Wu,<sup>1</sup> Yong-Qi Zhao,<sup>1</sup> Xin Huang,<sup>1</sup> Tong Zhao,<sup>1</sup> Lun Xu,<sup>1</sup> Kui-Wu Wu,<sup>1</sup> Ming-Gao Li,<sup>2\*</sup> Ling-Ling Zhu,<sup>1,3\*</sup> and Ming Fan<sup>1,3,4\*</sup>

Online address: <http://www.molmed.org>

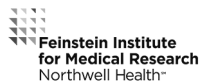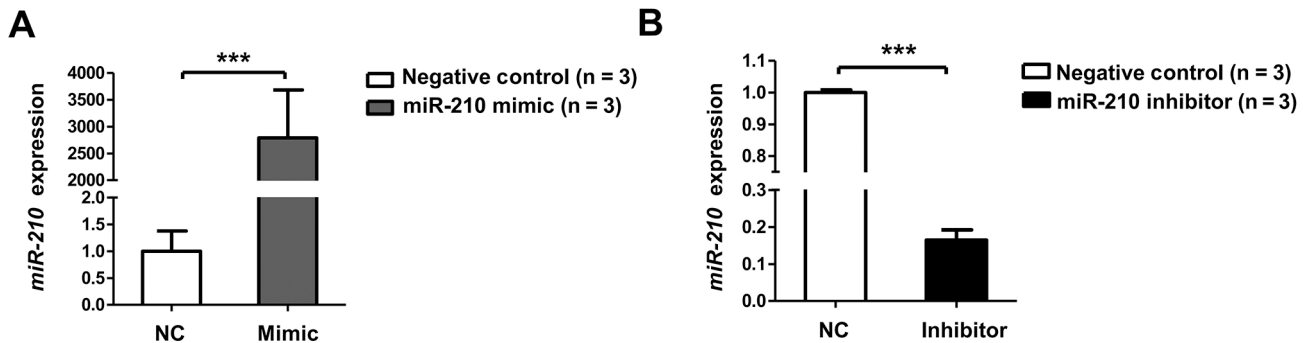

**Supplementary Figure S1.** Cellular miR-210 expression after miR-210-3p mimic or inhibitor transfection in HK-2 cells. We transfected miR-210-3p mimic or inhibitor into HK-2 cells and examined cellular miR-210 expression in hypoxia (0.3% O<sub>2</sub>) and normoxia (21% O<sub>2</sub>) for 48 h. Cellular miR-210 expression can be (A) elevated with miR-210 mimic (n = 3) and (B) suppressed with miR-210 inhibitor (n = 3) in HK-2 cells compared with the negative control separately. Real-time PCR analysis of miR-210 abundance compared with RNU6 and is shown as mean ± SD. NC, negative control. \*P < 0.05; \*\*P < 0.01; \*\*\*P < 0.001.

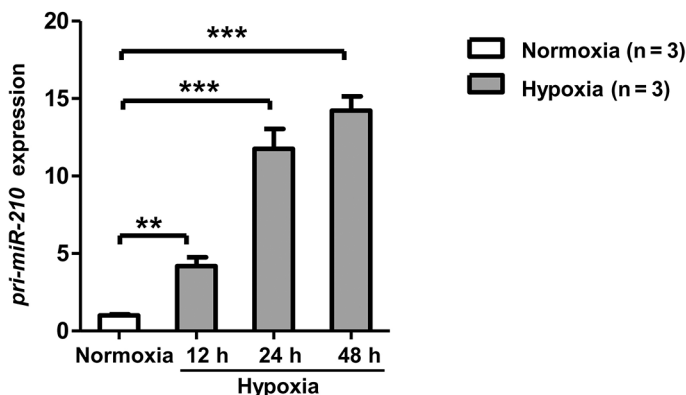

**Supplementary Figure S2.** Cellular pri-miR-210 expression after hypoxia in HK-2 cells. HK-2 cells were cultured in normoxia (21% O<sub>2</sub>) or hypoxia (0.3% O<sub>2</sub>) and harvested at 12 h, 24 h and 48 h. Real-time PCR analysis of pri-miR-210 levels in HK-2 cell. Cellular pri-miR-210 levels were normalized to β-actin (n = 3). Data are shown as mean ± SD. \*P < 0.05; \*\*P < 0.01; \*\*\*P < 0.001.

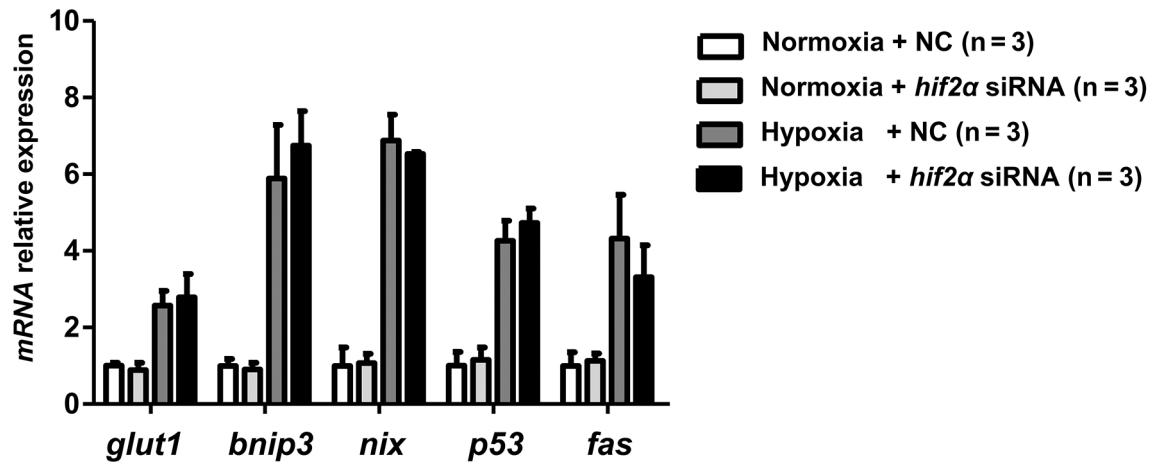

**Supplementary Figure S3.** HIF-2 $\alpha$  knockdown showed no effect on hypoxia-related and apoptosis genes. Hypoxia-related genes (GLUT-1, BNIP3 and NIX) and apoptotic genes (p53 and FAS) were measured by real-time PCR in HK-2 cells transfected with HIF-2 $\alpha$  siRNA and negative control under normoxia (21% O<sub>2</sub>) or hypoxia (0.3% O<sub>2</sub>) conditions for 48 h. All quantitative results are from three independent experiments. All mRNA expression levels were normalized to  $\beta$ -actin (n = 3) and are shown as mean  $\pm$  SD.

**Supplementary Table S1.** Sequences of qPCR primers

| Rat                             |                               |                                |
|---------------------------------|-------------------------------|--------------------------------|
|                                 | Forward (5' $\rightarrow$ 3') | Reverse (5' $\rightarrow$ 3')  |
| <i>hif1<math>\alpha</math></i>  | CCGCAGTGTGGCTACAAGAA          | GATGAGGAATGGGTTCAAAATC         |
| <i>hif2<math>\alpha</math></i>  | ACTTACCCAGGTAGAATAACAG        | GTGACGGTACACTTCATCCT           |
| <i>glut1</i>                    | CATCAATGCTGTGTTCTACTACTC      | GCCACGATACTCAGATAGGAC          |
| <i>bnip3</i>                    | AAACAGCACTCTGTCTGAGGA         | TCATGCTGAGAGTAGCTGTG           |
| <i>nix</i>                      | ATTCAGACACCCTAAGCGT           | TCCGATATAGATGCCAGCC            |
| <i>p53</i>                      | AAGACTGGATAACTGTCATGGA        | CATGGAATTAGGTGACCCTG           |
| <i>fas</i>                      | CCCGGACCCAGAATACCAAG          | TCTTCAAGTCCACACGAGGTG          |
| <i><math>\beta</math>-actin</i> | CCAGTTCGCCATGGATGAC           | ATGCCGGAGCCGTTGTC              |
| Human                           |                               |                                |
|                                 | Forward (5' $\rightarrow$ 3') | Reverse (5' $\rightarrow$ 3')  |
| <i>hif1<math>\alpha</math></i>  | AGGGCAGAATCATCACGAAGT         | AGGGTCTCGATTGGATGGCA           |
| <i>hif2<math>\alpha</math></i>  | CGGAGGTGTTCTATGAGCTGG         | AGCTTGTGTGTCGCAGGAA            |
| <i>glut1</i>                    | GGCCAAGAGTGTGCTAAAGAA         | ACAGCGTTGATGCCAGACAG           |
| <i>bnip3</i>                    | CAGGGCTCCTGGGTAGAACT          | CTACTCCGTCCAGACTCATGC          |
| <i>nix</i>                      | ATGTCGTCCCACCTAGTCGAG         | TGAGGATGGTACGTGTTCCAG          |
| <i>p53</i>                      | GAGGGATGTTGGGAGATGTAAGAAATG   | TTCACAGATATGGGCCTTGAAGTTAGAGAA |
| <i>fas</i>                      | CCAATTCTGCCATAAGCCT           | CCACTTCTAAGCCATGTCCT           |
| <i>pri-miR-210</i>              | CTCGGACGCCCAAGTTGGAG          | CACAGATCAGCCGCTGTCAC           |
| <i><math>\beta</math>-actin</i> | CATGTACGTTGCTATCCAGGC         | CTCCTTAATGTCACGCACGAT          |
